# Supplementary material
Source: Springer Nature journal article supplement (https://www.springermedizin.de/resource/supplementary/12890_2012_392_MOESM1_ESM.pdf/9505120)
Supplement: MOESM1 [file 9505120]

Patients  
enrolled 37

7 patients  
excluded

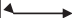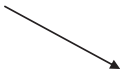

30 PATIENTS INCLUDED

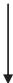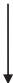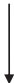

10 patients HFCWO

30 m' session twice daily

Oscillating frequency 13-  
15 Hz

Pressure 2-5 cmH<sub>2</sub>O

10 patients CPT

45 m' session twice daily

CPT techniques :  
Positive expiratory  
pressure (PEP)  
devices, postural  
drainage, percussion

ELTGOL

10 patients

Medical therapy

Control group

HFCWO HIGH FREQUENCY CHEST WALL OSCILLATION

CPT CHEST PHYSIOTHERAPY
